# Supplementary material for: Molecule design and isomorphism synthesis towards artificial enzymes
Source: Royal Society of Chemistry journal article supplement (doi:10.1039/c2ce26820e), 2012-11-14
Supplement: c2ce26820e.pdf [file c2ce26820e.pdf]

# Molecule Design and Isomorphism Synthesis Towards Artificial Enzyme

## (Supporting information)

### Experimental Section

**Materials and general methods.** All chemicals were commercially purchased and used as supplied. Elemental analyses of C, H, and N were performed using an EA1110 elemental analyzer. The IR spectrum was recorded in the range 4000–400  $\text{cm}^{-1}$  on a HYPERION spectrometer with a pressed KBr pellet. The TG-DTA analysis was carried out by Universal Analysis 2000 thermogravimetric analyzer (TGA) in  $\text{N}_2$  with a heating rate of 10  $^{\circ}\text{C}/\text{min}$ . The powder X-ray diffraction (PXRD) data was collected on an X'Pert-ProMPD (Holand) D/max- $\gamma$ A X-ray diffractometer with Cu  $K\alpha$  radiation in a flat plate geometry. Crystal data were collected on a Bruker X8 APEX II-CCD single crystal X-ray diffractometer with Mo  $K\alpha$  radiation ( $\lambda = 0.71073\text{\AA}$ ).

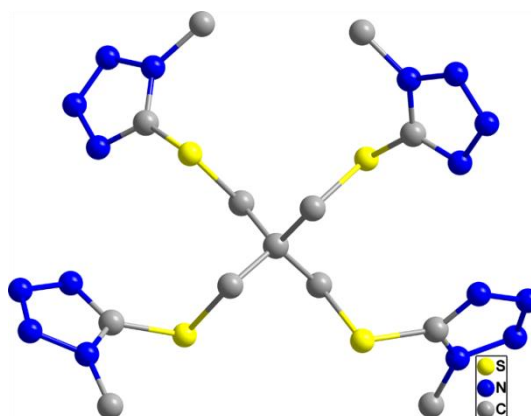

**Scheme S1.** The bpbb ligand used in this report.

**Synthesis of  $\text{Cu}_3(\text{bpbb})_2(\text{PW}_{12}\text{O}_{40})\cdot 3\text{H}_2\text{O}$  (1):** A mixture of  $\text{CuAc}_2\cdot\text{H}_2\text{O}$  (0.12 g, 0.60 mmol), bpbb (0.08 g, 0.15 mmol),  $\text{H}_3\text{PW}_{12}\text{O}_{40}\cdot n\text{H}_2\text{O}$  (0.29 g, 0.10 mmol) was dissolved in 10 mL of distilled water at room temperature. When the pH value of the mixture was adjusted to about 1.9 with 1.0  $\text{mol}\cdot\text{L}^{-1}$   $\text{HClO}_4$ , the suspension was put into a 15 ml Teflon-lined autoclave and kept under autogenous pressure at 160  $^{\circ}\text{C}$  for 3 days. After cooling to room temperature slowly, brown crystals of compound **1** were filtered and washed with distilled water (Yields 68% based on W). Anal. Calcd for  $\text{C}_{26}\text{H}_{46}\text{Cu}_3\text{N}_{32}\text{O}_{43}\text{S}_8\text{PW}_{12}$ : C 7.47, H 1.10, N 10.73, P 0.74, W 52.79, Cu 4.56 %. Found: C 7.52, H 1.15, N 10.68, P 0.66, W 52.70, Cu 4.61 %. IR (KBr pellet,  $\text{cm}^{-1}$ ): 1609, 1410, 1275, 1180, 1078, 978, 893, 814. CCDC number 878793.

**Synthesis of  $[\text{Cu}_4(\text{bpbb})_2(\text{SiW}_{12}\text{O}_{40})(\text{H}_2\text{O})_2]\cdot\text{H}_2\text{O}$  (2):** It was prepared in a manner similar to that for compound **1**, but the POMs  $\text{H}_4\text{SiW}_{12}\text{O}_{40}\cdot n\text{H}_2\text{O}$  (0.29 g, 0.10 mmol) was used instead of  $\text{H}_3\text{PW}_{12}\text{O}_{40}\cdot n\text{H}_2\text{O}$ . When the pH value of the mixture was adjusted to about 2.4 with 1.0  $\text{mol}\cdot\text{L}^{-1}$   $\text{HClO}_4$ , the suspension was put into a 15 ml Teflon-lined autoclave and kept under autogenous pressure at 160  $^{\circ}\text{C}$  for 3 days. After cooling to room temperature slowly, orange crystals of compound **2** were filtered and washed with distilled water (Yields 75% based on W). Anal. Calcd

for  $C_{26}H_{46}Cu_4N_{32}O_{43}S_8SiW_{12}$ : C 7.37, H 1.09, N 10.57, Si 0.66, W 52.04, Cu 5.99 %. Found: C 7.45, H 1.14, N 10.48, Si 0.61, W 52.15, Cu 5.87 %. IR (KBr pellet,  $cm^{-1}$ ): 1620, 1439, 1277, 1182, 1013, 972, 920, 797. CCDC number 878794.

**Synthesis of  $Cu_3(bpbbs)_2(PMo_{12}O_{40}) \cdot 3H_2O$  (3):** It was prepared in a manner similar to that for compound **1**, but the POMs  $H_3PMoO_{40} \cdot nH_2O$  (0.18g, 0.10 mmol) was used instead of  $H_3PW_{12}O_{40} \cdot nH_2O$ . When the pH value of the mixture was adjusted to about 2.4 with  $1.0 mol \cdot L^{-1}$   $HClO_4$ , the suspension was put into a 15 ml Teflon-lined autoclave and kept under autogenous pressure at 160 °C for 3 days. After cooling to room temperature slowly, black crystals of compound **3** were filtered and washed with distilled water (Yields 85% based on Mo). Anal. Calcd for  $C_{26}H_{46}Cu_3N_{32}O_{43}S_8PMo_{12}$ : C 9.99, H 1.47, N 14.35, P 0.99, Mo 36.86, Cu 6.10 %. Found: C 10.05, H 1.53, N 14.28, P 0.94, Mo 36.94, Cu 6.02 %. IR (KBr pellet,  $cm^{-1}$ ): 1618, 1404, 1277, 1180, 1059, 957, 874, 804. CCDC number 878795.

**Synthesis of  $[Cu_4(bpbbs)_2(SiMo_{12}O_{40})(H_2O)_2] \cdot H_2O$  (4):** It was prepared in a manner similar to that for compound **1**, but the POMs  $H_4SiMo_{12}O_{40} \cdot nH_2O$  (0.18 g, 0.10 mmol) was used instead of  $H_3PW_{12}O_{40} \cdot nH_2O$ . When the pH value of the mixture was adjusted to about 2.4 with  $1.0 mol \cdot L^{-1}$   $HClO_4$ , the suspension was put into a 15 ml Teflon-lined autoclave and kept under autogenous pressure at 160 °C for 3 days. After cooling to room temperature slowly, black crystals of compound **4** were filtered and washed with distilled water (Yields 80% based on Mo). Anal. Calcd for  $C_{26}H_{46}Cu_4N_{32}O_{43}S_8SiMo_{12}$ : C 9.81, H 1.44, N 14.07, Si 0.97, Mo 36.16, Cu 7.98 %. Found: C 9.87, H 1.35, N 14.15, Si 0.89, Mo 36.10, Cu 8.09 %. IR (KBr pellet,  $cm^{-1}$ ): 1618, 1404, 1277, 1180, 947, 901, 795. CCDC number 878796.

**Crystal Structure of Compound 1.** Single crystal X-ray analysis shows that the structure of compound **1** contains one  $[PW_{12}O_{40}]^{3-}$  (abbreviated as  $PW_{12}$ ) polyoxoanion, two types of bpbbs ligands ( $bpbbs^1$ ,  $bpbbs^2$ ), three kinds of  $Cu^+$  ions ( $Cu1$ ,  $Cu2$ ,  $Cu3$ ) and three lattice water molecules in the crystallographically independent unit (Fig. S1). Analysis of the bond valence sum calculations (BVS) suggests that all the copper ions are in the +I oxidation state.

In compound **1**, the  $PW_{12}$  polyanion is two coordinated by  $Cu1$  and  $Cu3$  atoms through the terminal O13 and bridging O21 atoms (Fig. S2). There are two crystallographically independent bpbbs ligands ( $bpbbs^1$ ,  $bpbbs^2$ ) in compound **1**, which exhibit two kinds of coordination geometries (Fig. S3). Each  $bpbbs^1$  ligand provides six N-donors to coordinate four copper ions (one  $Cu1$ , one  $Cu2$  and two  $Cu3$  ions). While the  $bpbbs^2$  ligand acts as a linker to coordinate three copper ions (one  $Cu1$  and two  $Cu2$  ions). It is worthy noting that a tetrazolate ring is not coordinated in the  $bpbbs^2$  ligand. In addition, three kinds of  $Cu^+$  ions with different coordination patterns are existed in compound **1** (Fig. S4). Due to the strong Jahn–Teller effect of the  $d^9$  electronic configuration, the  $Cu1$  ion adopts a tetrahedron geometry which is completed by three nitrogen atoms (N1, N5 from  $bpbbs^1$  ligand and N18 from  $bpbbs^2$  ligand), and one terminal oxygen atom (O13) from  $PW_{12}$  polyoxoanions.  $Cu2$  ion exhibits a similar coordination environment to  $Cu1$  ion except that the three nitrogen atoms (N9, N13, N14) are from two  $bpbbs^2$  ligands and one bridging oxygen atom (O21) from the  $PW_{12}$  polyoxoanions. While  $Cu3$  ion is coordinated by one nitrogen atom (N6) from the  $bpbbs^1$  ligand and three nitrogen atom (N17, N25, N30) from two  $bpbbs^2$  ligands (Fig. S3). The bond distances around the  $Cu^+$  ions are normal.

Further crystal structure analysis reveals that compound **1** is constructed by two dimeric structures (dimer-1 and dimer-2). Dimer-1 is formed by two  $bpbbs^1$  ligands and two  $PW_{12}$  anions arraying in a circle by sharing four  $Cu^+$  ions (two  $Cu1$  and two  $Cu3$  ions) (Fig. S5). Furthermore,

the dimer-1 structures connect to each other via sharing two Cu3 ions to generate a straight chain (Fig. S6). These straight chains pack in parallel in the ac plane. The dimer-2 is formed by two bpbb<sup>2</sup> ligands which connect with each other by sharing two Cu2 ions. These dimer-2 units span the channels between neighboring chains and keep them link together by sharing four Cu<sup>+</sup> ions (two Cu1 and two Cu2 ions) with them, yielding a 2D layer (Fig. S7).

**Crystal Structure of Compound 2.** Crystal structure analysis reveals that compound **2** also exhibits a 2D layer, which is constructed by one [SiW<sub>12</sub>O<sub>40</sub>]<sup>4-</sup> (abbreviated as SiW<sub>12</sub>) polyoxoanion, two types of bpbb ligands with different coordination patterns (bpbb<sup>3</sup>, bpbb<sup>4</sup>), four kinds of Cu cations (Cu1, Cu2, Cu3, Cu4) and one lattice water molecules in the asymmetric unit (Fig. S8-9).

The basic structure of compound **2** is similar to compound **1** except one Cu<sup>+</sup> ion different. This additional Cu<sup>+</sup> (Cu4) ion adopts a four-coordinated trigonal-pyramidal geometry of [Cu<sub>(4)</sub>N<sub>2</sub>O<sub>2</sub>] by two N atoms from two bpbb ligands (N2 atom from bpbb<sup>3</sup> ligand; N22 atom from bpbb<sup>4</sup> ligand) and two O atoms from two lattice water molecules (Fig. S11). As a result, the bpbb<sup>1</sup> ligand in compound **1** is replaced by bpbb<sup>3</sup> ligand in compound **2**, and bpbb<sup>2</sup> ligand is replaced by bpbb<sup>4</sup> ligand (Fig. S12). Each bpbb<sup>3</sup> ligand provides seven N-donors to coordinate five copper ions (one Cu1, one Cu2, one Cu4 and two Cu3 ions). And the bpbb<sup>4</sup> ligand is connected four copper ions (one Cu1, one Cu4 and two Cu2 ions) in a bridging mode.

In other words, the compound **2** is constructed by another two dimeric structures (dimer-3 and dimer-4). Dimer-3 is formed by two bpbb<sup>3</sup> ligands and two SiW<sub>12</sub> anions arraying in a circle by sharing four Cu atoms (two Cu1 and two Cu3 ions) (Fig. S13). The dimer-4 is formed by two bpbb<sup>4</sup> ligands connected together by sharing two Cu2 ions. Furthermore, the relationship between dimer-3 structures and dimer-4 units is similar to it between dimer-1 structures and dimer-2 units (Fig. S14-15).

**Crystal Structure of Compound 3.** Crystal analysis shows that the structure of compound **3** contains one [PMo<sub>12</sub>O<sub>40</sub>]<sup>3-</sup> (abbreviated as PMo<sub>12</sub>) polyoxoanion, two types of bpbb ligands with different coordination patterns (bpbb<sup>5</sup>, bpbb<sup>6</sup>), three kinds of Cu cations (Cu1, Cu2, Cu3) and three lattice water molecules in the crystallographically independent unit (Fig. S16). In other words, compound **3** has the same structure as compound **1** except that the PW<sub>12</sub> anion is replaced by the PMo<sub>12</sub> anion. As a result, the dimer-1 is replaced by dimer-5 and dimer-2 is replaced by dimer-6 (Fig. S17-22).

**Crystal Structure of Compound 4.** Crystal structure analysis reveals that compound **4** is constructed by one [SiMo<sub>12</sub>O<sub>40</sub>]<sup>4-</sup> (abbreviated as SiMo<sub>12</sub>) polyoxoanion, two types of bpbb ligands with different coordination patterns (bpbb<sup>7</sup>, bpbb<sup>8</sup>), four kinds of Cu cations (Cu1, Cu2, Cu3, Cu4) and one lattice water molecules in the asymmetric unit (Fig. S23). In other words, compound **4** has the same structure as compound **2** except that the SiW<sub>12</sub> anion is replaced by the SiMo<sub>12</sub> anion. As a result, the dimer-3 is replaced by dimer-7 and dimer-4 is replaced by dimer-8 (Fig. S24-29).

Table S1. Crystal Data and Structural Refinements for compounds **1-4**.

|                                                                 | <b>1</b>                                                          | <b>2</b>                                                          | <b>3</b>                                                          | <b>4</b>                                                          |
|-----------------------------------------------------------------|-------------------------------------------------------------------|-------------------------------------------------------------------|-------------------------------------------------------------------|-------------------------------------------------------------------|
|                                                                 | C <sub>26</sub> H <sub>46</sub> Cu <sub>3</sub> N <sub>32</sub> - | C <sub>26</sub> H <sub>46</sub> Cu <sub>4</sub> N <sub>32</sub> - | C <sub>26</sub> H <sub>46</sub> Cu <sub>3</sub> N <sub>32</sub> - | C <sub>26</sub> H <sub>46</sub> Cu <sub>4</sub> N <sub>32</sub> - |
| formula                                                         | O <sub>43</sub> S <sub>8</sub> PW <sub>12</sub>                   | O <sub>43</sub> S <sub>8</sub> SiW <sub>12</sub>                  | O <sub>43</sub> S <sub>8</sub> PMo <sub>12</sub>                  | O <sub>43</sub> S <sub>8</sub> SiMo <sub>12</sub>                 |
| Fw                                                              | 4179.22                                                           | 4239.88                                                           | 3124.30                                                           | 3184.96                                                           |
| crystal system                                                  | triclinic                                                         | triclinic                                                         | triclinic                                                         | triclinic                                                         |
| space group                                                     | <i>P</i> $\bar{1}$                                                | <i>P</i> $\bar{1}$                                                | <i>P</i> $\bar{1}$                                                | <i>P</i> $\bar{1}$                                                |
| <i>a</i> (Å)                                                    | 13.1028(11)                                                       | 13.095(3)                                                         | 13.063(3)                                                         | 13.0057(7)                                                        |
| <i>b</i> (Å)                                                    | 13.5056(11)                                                       | 13.375(3)                                                         | 13.512(4)                                                         | 13.3497(8)                                                        |
| <i>c</i> (Å)                                                    | 23.797(2)                                                         | 23.823(5)                                                         | 23.709(6)                                                         | 23.6446(13)                                                       |
| $\alpha$ (deg)                                                  | 92.405(2)                                                         | 92.183(4)                                                         | 92.366(6)                                                         | 91.917(1)                                                         |
| $\beta$ (deg)                                                   | 91.395(1)                                                         | 90.456(3)                                                         | 91.564(5)                                                         | 91.017(1)                                                         |
| $\gamma$ (deg)                                                  | 105.902(1)                                                        | 105.986(3)                                                        | 105.990(5)                                                        | 106.702(1)                                                        |
| <i>V</i> (Å <sup>3</sup> )                                      | 4043.6(6)                                                         | 4007.8(14)                                                        | 4016.3(18)                                                        | 3928.2(4)                                                         |
| <i>Z</i>                                                        | 2                                                                 | 2                                                                 | 2                                                                 | 2                                                                 |
| <i>D</i> <sub>c</sub> (g/cm <sup>3</sup> )                      | 3.432                                                             | 3.513                                                             | 2.584                                                             | 2.693                                                             |
| $\mu$ (mm <sup>-1</sup> )                                       | 18.091                                                            | 18.506                                                            | 2.916                                                             | 3.240                                                             |
| <i>F</i> (000)                                                  | 3776.0                                                            | 3832.0                                                            | 3008.0                                                            | 3064.0                                                            |
| colld reflns                                                    | 53668                                                             | 54724                                                             | 55203                                                             | 52951                                                             |
| unique reflns                                                   | 14130                                                             | 14018                                                             | 13998                                                             | 13747                                                             |
| obsd reflns                                                     | 12869                                                             | 11948                                                             | 12119                                                             | 12994                                                             |
| no. of param                                                    | 1134                                                              | 1145                                                              | 1134                                                              | 1152                                                              |
| <i>R</i> <sub>int</sub>                                         | 0.041                                                             | 0.035                                                             | 0.024                                                             | 0.017                                                             |
| Temperature (K)                                                 | 296                                                               | 296                                                               | 296                                                               | 150                                                               |
| GOF                                                             | 1.034                                                             | 1.048                                                             | 1.045                                                             | 1.034                                                             |
| <i>R</i> <sub>1</sub> <sup>a</sup> [ <i>I</i> > 2σ( <i>I</i> )] | 0.0267                                                            | 0.0287                                                            | 0.0242                                                            | 0.0554                                                            |
| <i>wR</i> <sub>2</sub> <sup>b</sup> (all data)                  | 0.0686                                                            | 0.0766                                                            | 0.0637                                                            | 0.1271                                                            |

<sup>a</sup>*R*<sub>1</sub> =  $\sum ||F_o| - |F_c|| / \sum |F_o|$ ; <sup>b</sup>*wR*<sub>2</sub> =  $\sum [w(F_o^2 - F_c^2)^2] / \sum [w(F_o^2)^2]^{1/2}$ .

Table S2. Selected bond distances (Å) and angles (°) for compounds **1-4**.

| Compound <b>1</b> |           |                     |           |
|-------------------|-----------|---------------------|-----------|
| Cu(1)-N(5)        | 1.97(3)   | Cu(2)-N(25)         | 2.04(4)   |
| Cu(1)-N(1)        | 1.97(4)   | Cu(2)-N(30)#1       | 2.06(3)   |
| Cu(1)-N(18)       | 2.08(3)   | Cu(3)-N(13)         | 1.93(3)   |
| Cu(1)-O(13)       | 2.33(3)   | Cu(3)-N(9)          | 1.96(3)   |
| Cu(2)-N(17)       | 2.00(3)   | Cu(3)-N(14)#2       | 2.15(3)   |
| Cu(2)-N(6)        | 2.04(3)   |                     |           |
| N(5)-Cu(1)-N(1)   | 137.8(14) | N(6)-Cu(2)-N(25)    | 101.1(13) |
| N(5)-Cu(1)-N(18)  | 108.7(13) | N(17)-Cu(2)-N(30)#1 | 110.1(14) |
| N(1)-Cu(1)-N(18)  | 110.6(14) | N(6)-Cu(2)-N(30)#1  | 108.8(14) |
| N(5)-Cu(1)-O(13)  | 97.6(11)  | N(25)-Cu(2)-N(30)#1 | 94.3(14)  |
| N(1)-Cu(1)-O(13)  | 97.7(12)  | N(13)-Cu(3)-N(9)    | 146.5(14) |
| N(18)-Cu(1)-O(13) | 89.3(12)  | N(13)-Cu(3)-N(14)#2 | 108.6(13) |
| N(17)-Cu(2)-N(6)  | 107.2(14) | N(9)-Cu(3)-N(14)#2  | 100.0(13) |

|                     |           |                       |           |
|---------------------|-----------|-----------------------|-----------|
| N(17)-Cu(2)-N(25)   | 133.4(14) |                       |           |
| <b>Compound 2</b>   |           |                       |           |
| Cu(1)-N(5)          | 1.978(8)  | Cu(3)-N(9)            | 1.968(8)  |
| Cu(1)-N(1)          | 2.006(8)  | Cu(3)-N(14)#2         | 2.123(8)  |
| Cu(1)-N(18)         | 2.062(8)  | Cu(3)-O(21)#3         | 2.435(6)  |
| Cu(1)-O(13)         | 2.247(6)  | Cu(3')-N(9)           | 1.998(11) |
| Cu(2)-N(17)         | 2.000(8)  | Cu(3')-N(13)          | 2.006(11) |
| Cu(2)-N(6)          | 2.047(8)  | Cu(3')-N(14)#2        | 2.153(11) |
| Cu(2)-N(25)         | 2.050(8)  | Cu(3')-S(3')          | 2.254(16) |
| Cu(2)-N(30)#1       | 2.074(8)  | Cu(4)-N(22)           | 1.923(12) |
| Cu(3)-N(13)         | 1.967(8)  | Cu(4)-N(2)            | 1.948(10) |
| N(5)-Cu(1)-N(1)     | 131.8(3)  | N(13)-Cu(3)-N(14)#2   | 106.6(3)  |
| N(5)-Cu(1)-N(18)    | 109.8(3)  | N(9)-Cu(3)-N(14)#2    | 98.2(3)   |
| N(1)-Cu(1)-N(18)    | 112.9(3)  | N(13)-Cu(3)-O(21)#3   | 102.2(3)  |
| N(5)-Cu(1)-O(13)    | 102.5(3)  | N(9)-Cu(3)-O(21)#3    | 93.5(3)   |
| N(1)-Cu(1)-O(13)    | 97.3(3)   | N(14)#2-Cu(3)-O(21)#3 | 100.5(3)  |
| N(18)-Cu(1)-O(13)   | 92.0(3)   | N(9)-Cu(3')-N(13)     | 141.2(5)  |
| N(17)-Cu(2)-N(6)    | 107.0(3)  | N(9)-Cu(3')-N(14)#2   | 96.3(4)   |
| N(17)-Cu(2)-N(25)   | 133.0(3)  | N(13)-Cu(3')-N(14)#2  | 104.1(4)  |
| N(6)-Cu(2)-N(25)    | 102.7(3)  | N(9)-Cu(3')-S(3')     | 51.1(5)   |
| N(17)-Cu(2)-N(30)#1 | 109.7(3)  | N(13)-Cu(3')-S(3')    | 127.6(5)  |
| N(6)-Cu(2)-N(30)#1  | 108.1(3)  | N(14)#2-Cu(3')-S(3')  | 127.2(5)  |
| N(25)-Cu(2)-N(30)#1 | 94.1(3)   | N(22)-Cu(4)-N(2)      | 160.4(5)  |
| N(13)-Cu(3)-N(9)    | 147.4(3)  |                       |           |
| <b>Compound 3</b>   |           |                       |           |
| Cu(1)-N(1)          | 1.97(3)   | Cu(2)-N(25)           | 2.04(3)   |
| Cu(1)-N(5)          | 1.97(3)   | Cu(2)-N(30)#1         | 2.07(3)   |
| Cu(1)-N(18)         | 2.08(3)   | Cu(3)-N(13)           | 1.94(3)   |
| Cu(1)-O(13)         | 2.32(3)   | Cu(3)-N(9)            | 1.96(3)   |
| Cu(2)-N(17)         | 2.01(3)   | Cu(3)-N(14)#2         | 2.17(3)   |
| Cu(2)-N(6)          | 2.02(3)   |                       |           |
| N(1)-Cu(1)-N(5)     | 137.5(13) | N(6)-Cu(2)-N(25)      | 101.1(13) |
| N(1)-Cu(1)-N(18)    | 110.6(13) | N(17)-Cu(2)-N(30)#1   | 109.6(13) |
| N(5)-Cu(1)-N(18)    | 108.6(12) | N(6)-Cu(2)-N(30)#1    | 108.9(13) |
| N(1)-Cu(1)-O(13)    | 99.0(11)  | N(25)-Cu(2)-N(30)#1   | 94.6(13)  |
| N(5)-Cu(1)-O(13)    | 97.3(11)  | N(13)-Cu(3)-N(9)      | 144.9(12) |
| N(18)-Cu(1)-O(13)   | 89.1(11)  | N(13)-Cu(3)-N(14)#2   | 107.7(11) |
| N(17)-Cu(2)-N(6)    | 107.3(13) | N(9)-Cu(3)-N(14)#2    | 99.3(12)  |
| N(17)-Cu(2)-N(25)   | 133.5(13) |                       |           |
| <b>Compound 4</b>   |           |                       |           |
| Cu(1)-N(5)          | 1.973(7)  | Cu(3)-O(21)#3         | 2.285(5)  |
| Cu(1)-N(1)          | 1.986(7)  | Cu(3')-N(13)          | 1.960(16) |
| Cu(1)-N(18)         | 2.048(7)  | Cu(3')-N(9)           | 1.973(18) |
| Cu(1)-O(13)         | 2.229(6)  | Cu(3')-N(14)#2        | 2.157(16) |

|                     |          |                       |           |
|---------------------|----------|-----------------------|-----------|
| Cu(2)-N(17)         | 1.990(7) | Cu(4)-N(22)           | 1.920(9)  |
| Cu(2)-N(25)         | 2.027(7) | Cu(4)-N(2)            | 1.954(8)  |
| Cu(2)-N(6)          | 2.028(7) | Cu(4)-O(2W)           | 2.214(7)  |
| Cu(2)-N(30)#1       | 2.064(7) | Cu(4)-O(1W)           | 2.644(9)  |
| Cu(3)-N(13)         | 1.950(7) | N(14)-Cu(3)#2         | 2.149(7)  |
| Cu(3)-N(9)          | 1.985(7) | N(14)-Cu(3')#2        | 2.157(16) |
| Cu(3)-N(14)#2       | 2.149(7) | N(30)-Cu(2)#1         | 2.064(7)  |
| N(5)-Cu(1)-N(1)     | 131.2(3) | N(9)-Cu(3)-N(14)#2    | 97.1(3)   |
| N(5)-Cu(1)-N(18)    | 108.7(3) | N(13)-Cu(3)-O(21)#3   | 106.4(2)  |
| N(1)-Cu(1)-N(18)    | 114.2(3) | N(9)-Cu(3)-O(21)#3    | 95.3(2)   |
| N(5)-Cu(1)-O(13)    | 100.1(2) | N(14)#2-Cu(3)-O(21)#3 | 100.4(2)  |
| N(1)-Cu(1)-O(13)    | 99.7(3)  | N(13)-Cu(3')-N(9)     | 144.5(10) |
| N(18)-Cu(1)-O(13)   | 93.2(2)  | N(13)-Cu(3')-N(14)#2  | 105.4(7)  |
| N(17)-Cu(2)-N(25)   | 134.2(3) | N(9)-Cu(3')-N(14)#2   | 97.2(8)   |
| N(17)-Cu(2)-N(6)    | 107.4(3) | N(22)-Cu(4)-N(2)      | 158.6(4)  |
| N(25)-Cu(2)-N(6)    | 102.5(3) | N(22)-Cu(4)-O(2W)     | 90.0(3)   |
| N(17)-Cu(2)-N(30)#1 | 108.9(3) | N(2)-Cu(4)-O(2W)      | 104.3(3)  |
| N(25)-Cu(2)-N(30)#1 | 93.5(3)  | N(22)-Cu(4)-O(1W)     | 96.8(3)   |
| N(6)-Cu(2)-N(30)#1  | 107.9(3) | N(2)-Cu(4)-O(1W)      | 92.0(3)   |
| N(13)-Cu(3)-N(9)    | 144.3(3) | O(2W)-Cu(4)-O(1W)     | 113.5(3)  |
| N(13)-Cu(3)-N(14)#2 | 106.1(3) |                       |           |

Symmetry code: for **1**: #1 -x+1, -y+1, -z+1; #2 -x+2, -y, -z; for **2**: #1 -x+1, -y+1, -z+1; #2 -x+2, -y, -z; #3 -x+1, -y, -z; for **3**: #1 -x+1, -y+1, -z+2; #2 -x+2, -y, -z+1; for **4**: #1 -x+2, -y+1, -z+1; #2 -x+1, -y+2, -z+2; #3 -x+2, -y+2, -z+2.

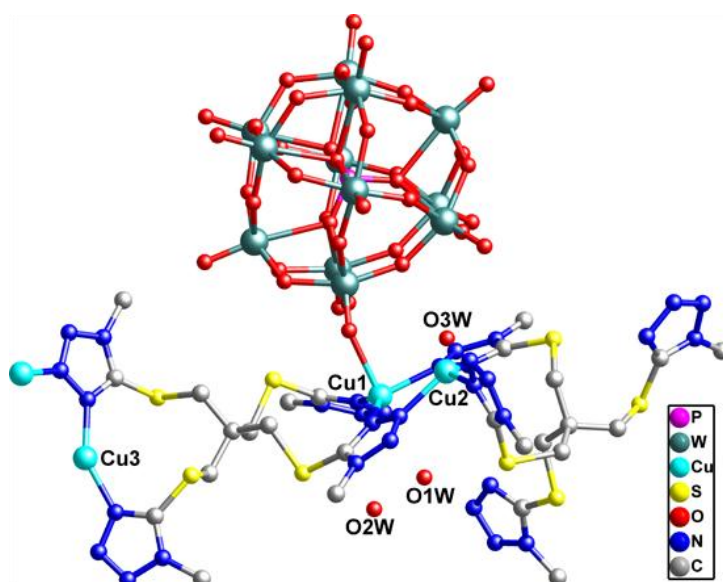

Fig. S1. Ball-and-stick view of the asymmetric unit of compound **1**. All H atoms are omitted for clarity.

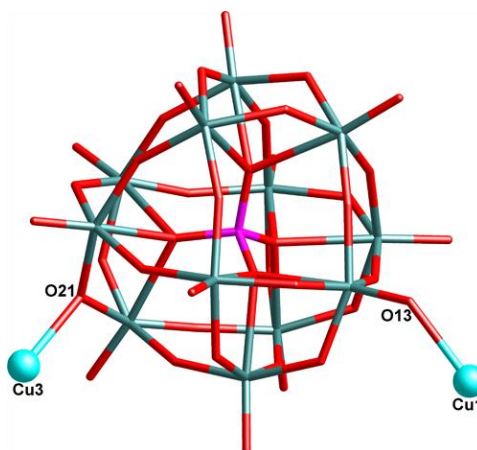

Fig. S2. View of coordination details of Keggin type polyoxoanion  $\text{PW}_{12}$  in compound **1**. Cu1 and Cu3 are coordinated atoms through the terminal O13 and bridging O21 atoms.

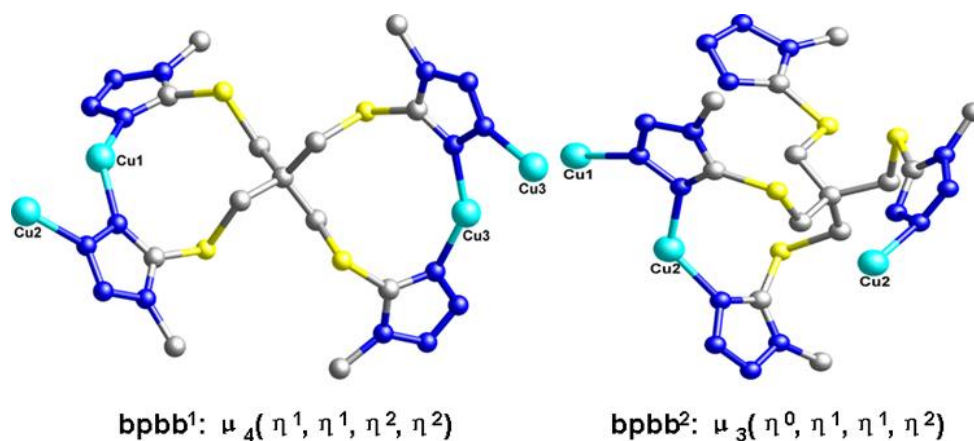

Fig. S3. The coordination modes of multiplex bpbb ligand in compound **1**.



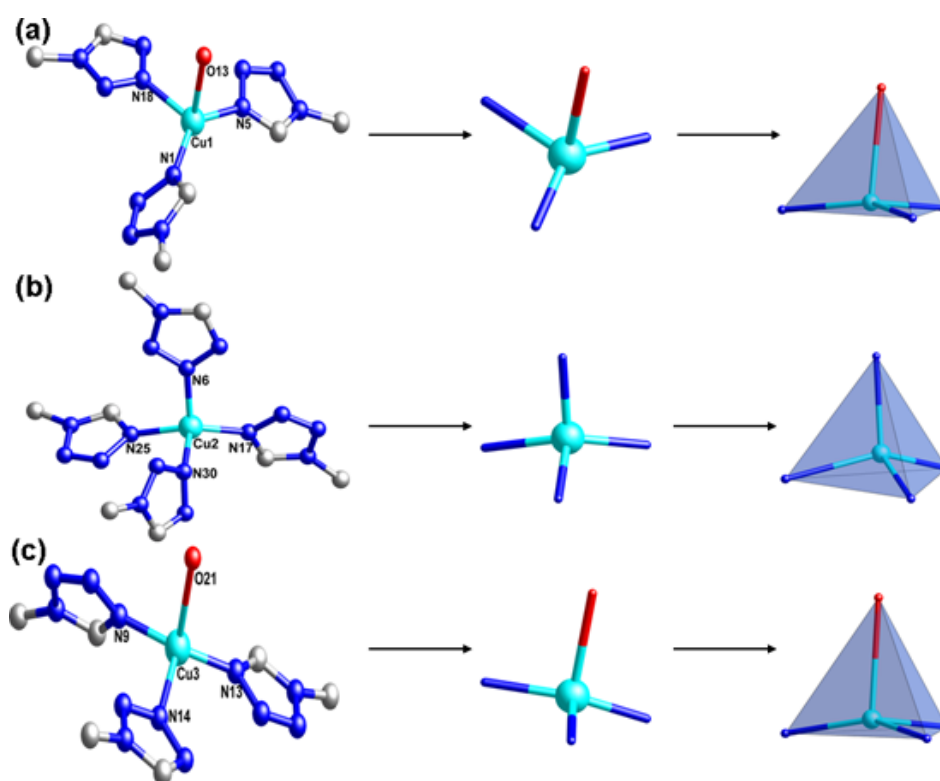

Fig. S4. The coordination details and modes of  $\text{Cu}^+$  ions in compound **1** (a) Cu1 (b) Cu2 (c) Cu3.

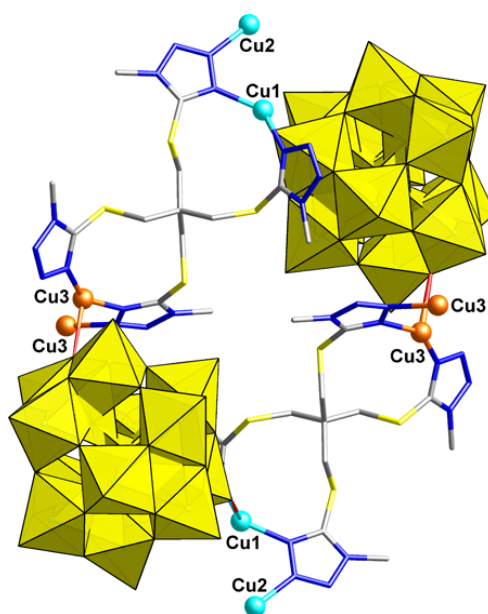

Fig. S5. Ball-and-stick and polyhedral representation of the dimer-1 structure in compound **1**.



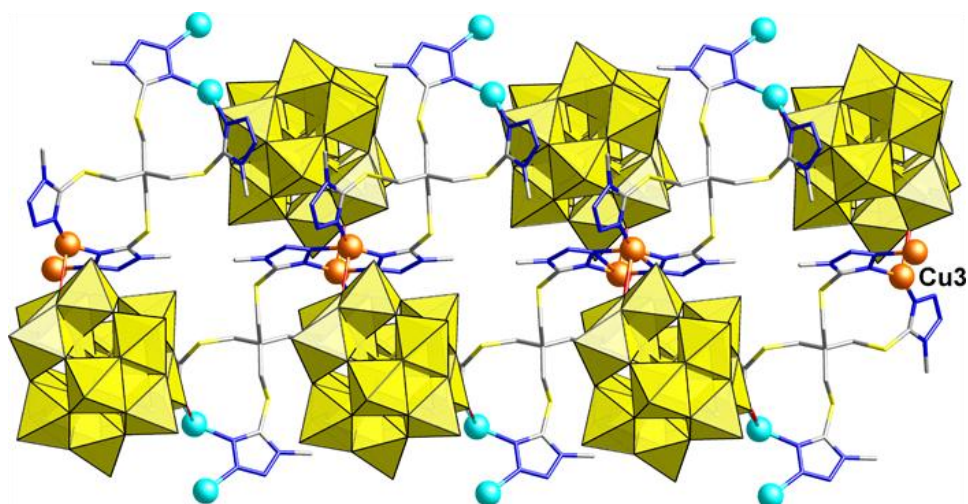

Fig. S6. The neighboring dimer-1 structures link together by sharing two Cu3 ions (orange) to form a straight chain in compound **1**.

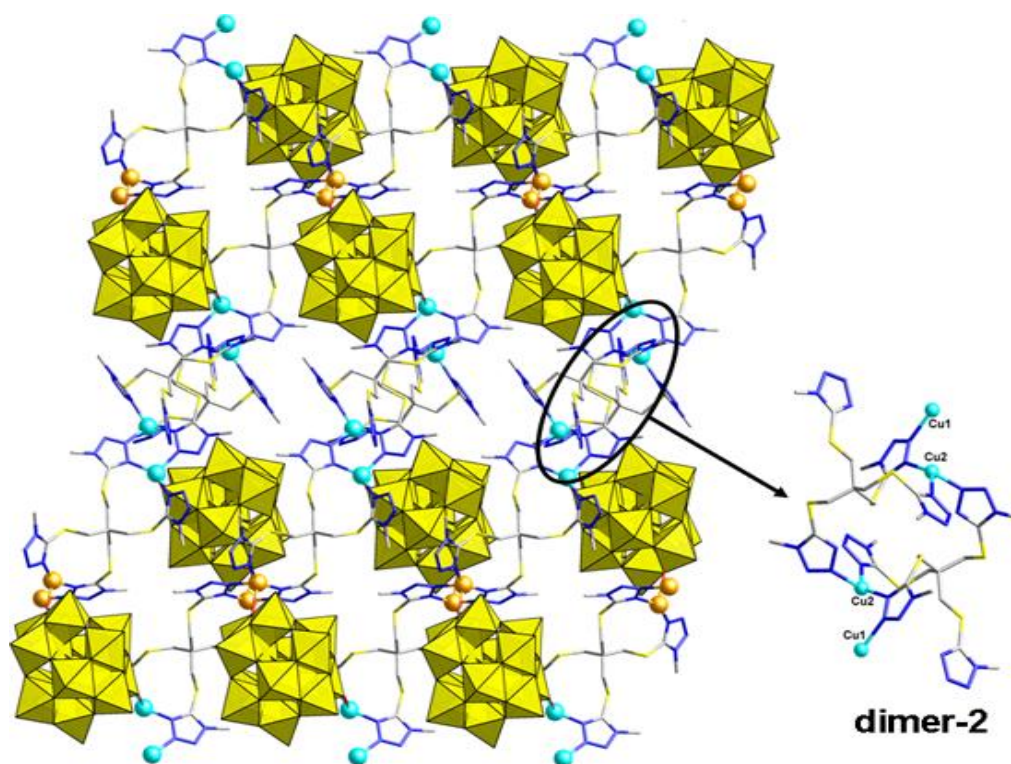

Fig. S7. Diagram illustrating the 2D layer in compound **1** which is constructed by straight chains and dimer-2 units. The dimer-2 unit is constructed by two bpbb<sup>2</sup> ligands.

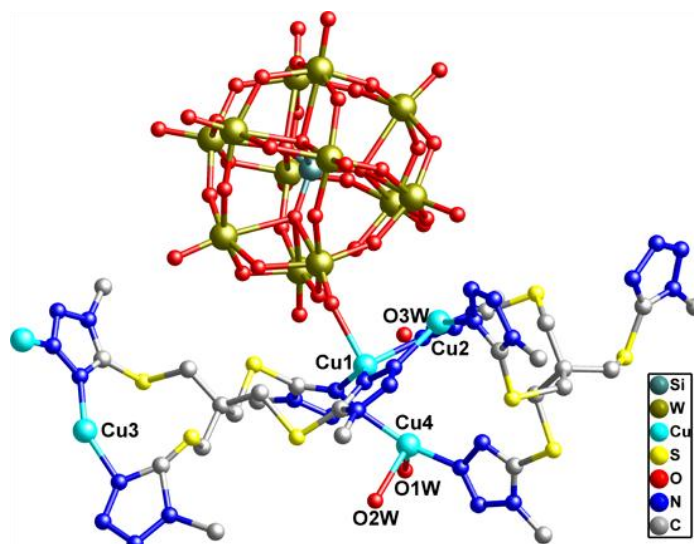

Fig. S8. Ball-and-stick view of the asymmetric unit of compound **2**. All H atoms are omitted for clarity.

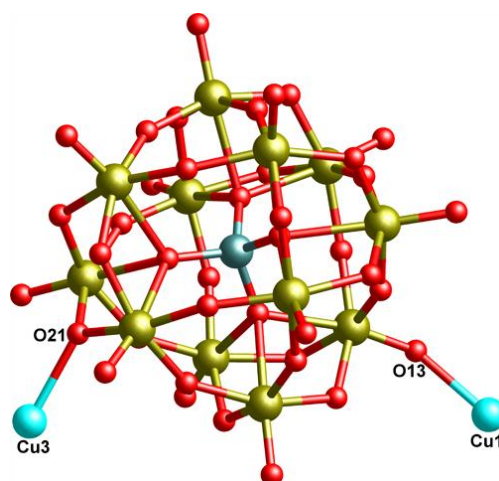

Fig. S9. View of coordination details of Keggin-type polyoxoanion  $\text{SiW}_{12}$  in compound **2**. Cu1 and Cu3 atoms are coordinated through the terminal O13 and bridging O21 atoms.

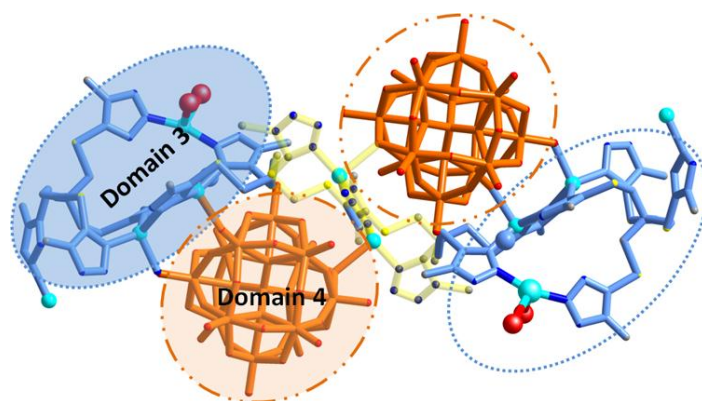

Fig. S10. Two structural domains (domain 3 and domain 4) included in compound **2**.

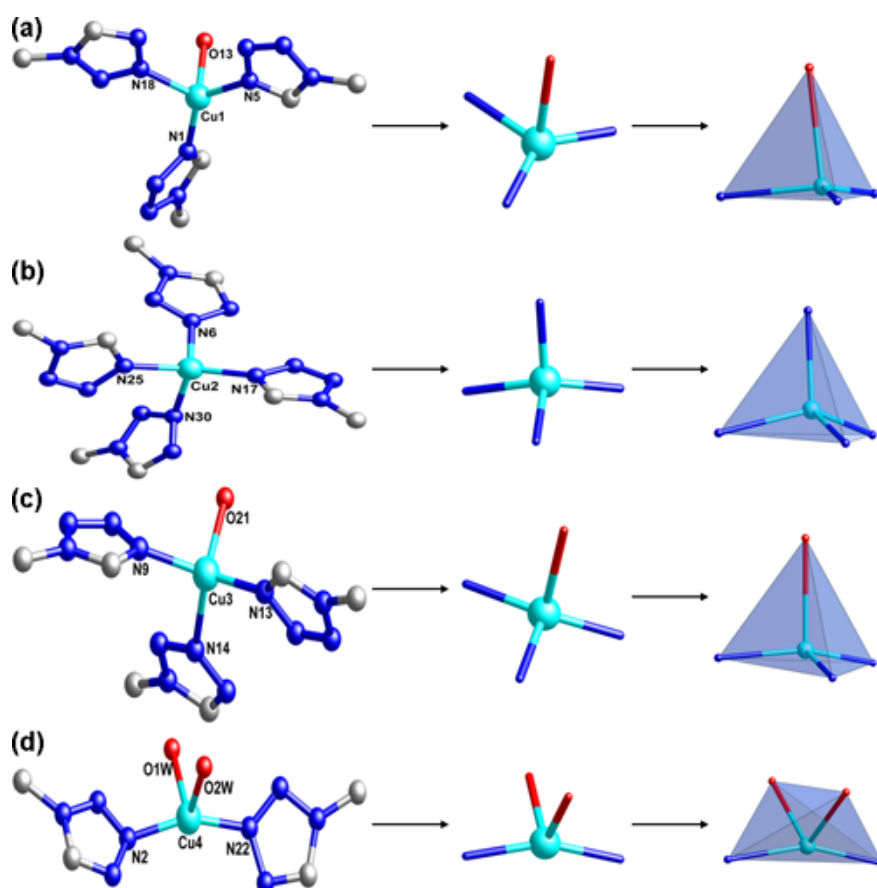

Fig. S11. The coordination details and modes of  $\text{Cu}^+$  ions in compound 2 (a) Cu1 (b) Cu2 (c) Cu3 (d) Cu4.

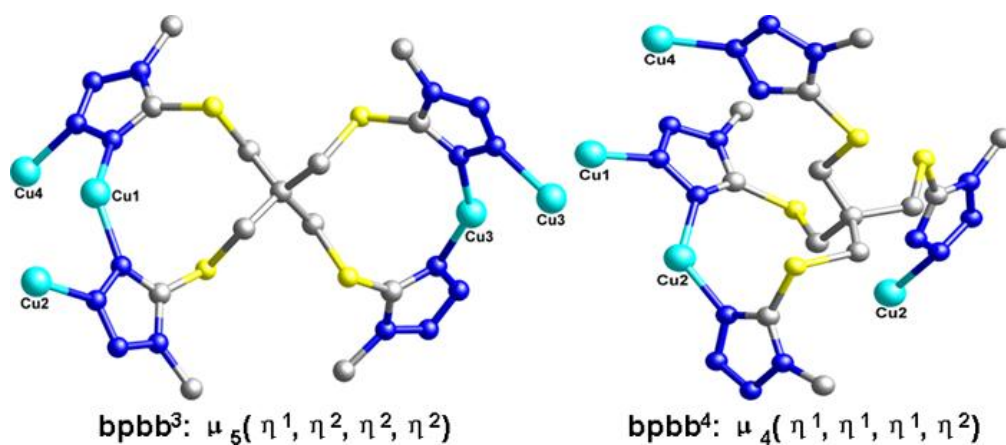

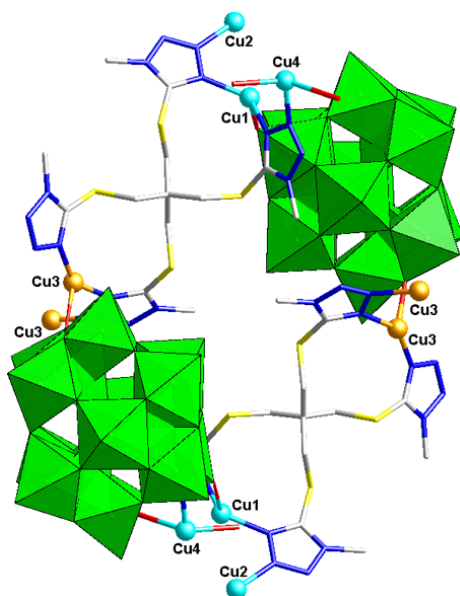

Fig. S13. Ball-and-stick and polyhedral representation of the dimer-3 structure in compound **2**.

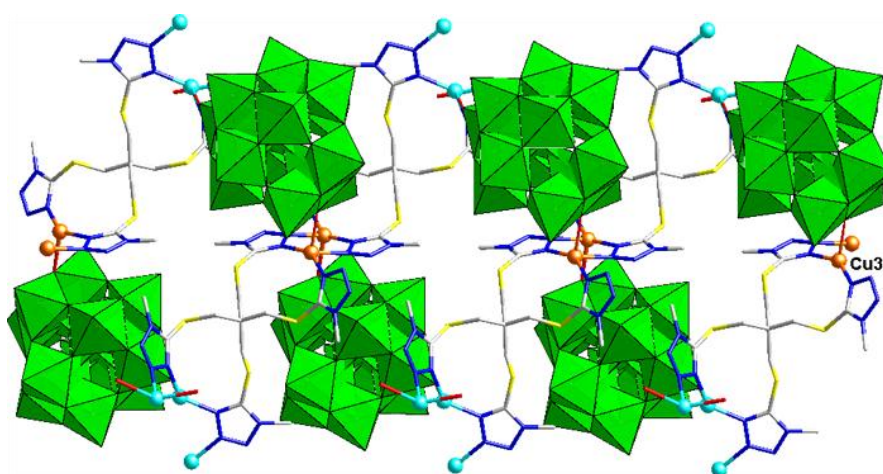

Fig. S14. The neighboring dimer-3 structures link together by sharing two Cu3 ions (orange) to generate a straight chain in compound **2**.



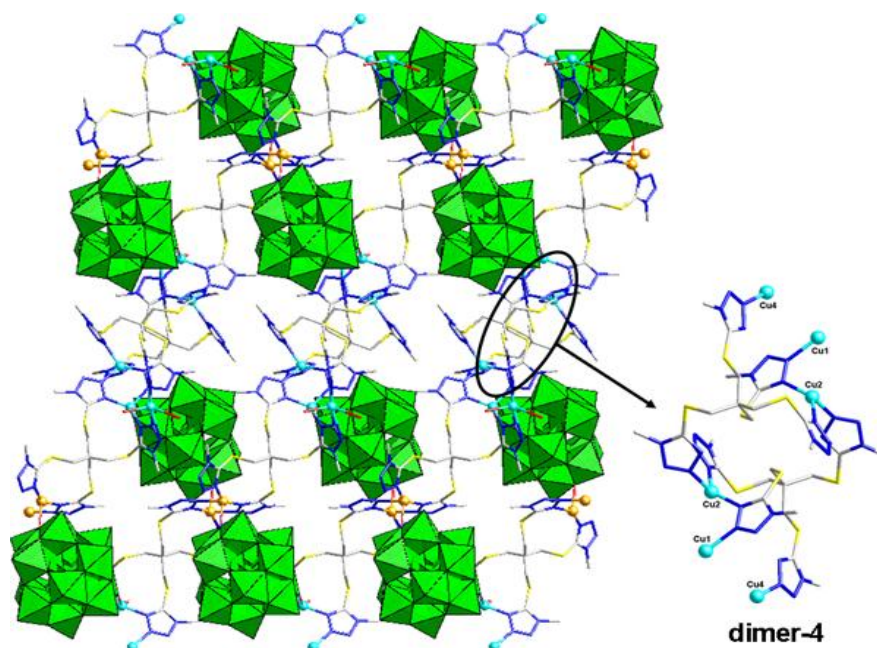

Fig. S15. Diagram illustrating the 2D layer in compound **2**, which is constructed by straight chains and dimer-4 units. The dimer-4 unit is constructed by two bpbb<sup>4</sup> ligands.

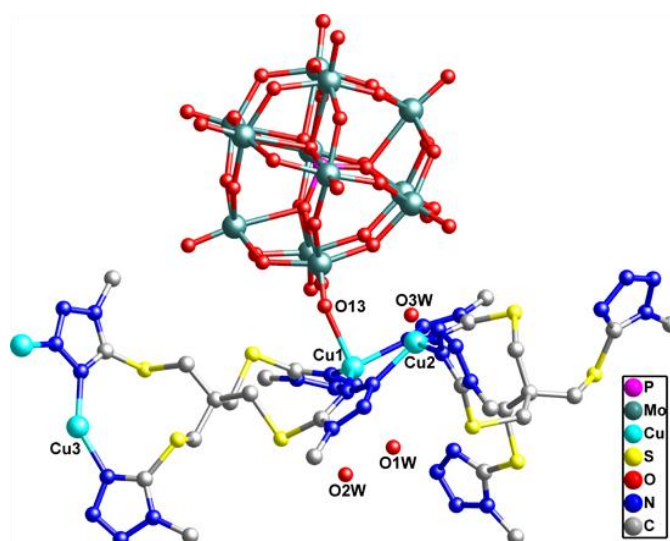

Fig. S16. Ball-and-stick view of the asymmetric unit of compound **3**. All H atoms are omitted for clarity.

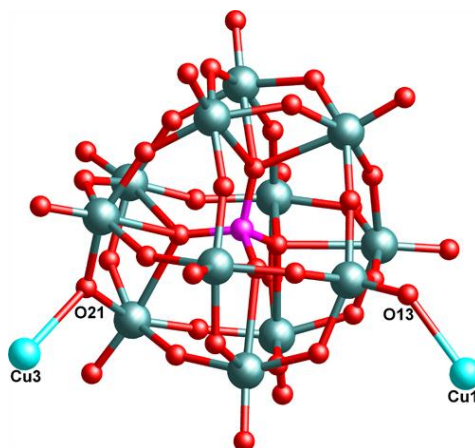

Fig. S17. View of coordination details of Keggin type polyoxoanion  $\text{PMo}_{12}$  in compound **3**. Cu1 and Cu3 atoms are coordinated through the terminal O13 and bridging O21 atoms.

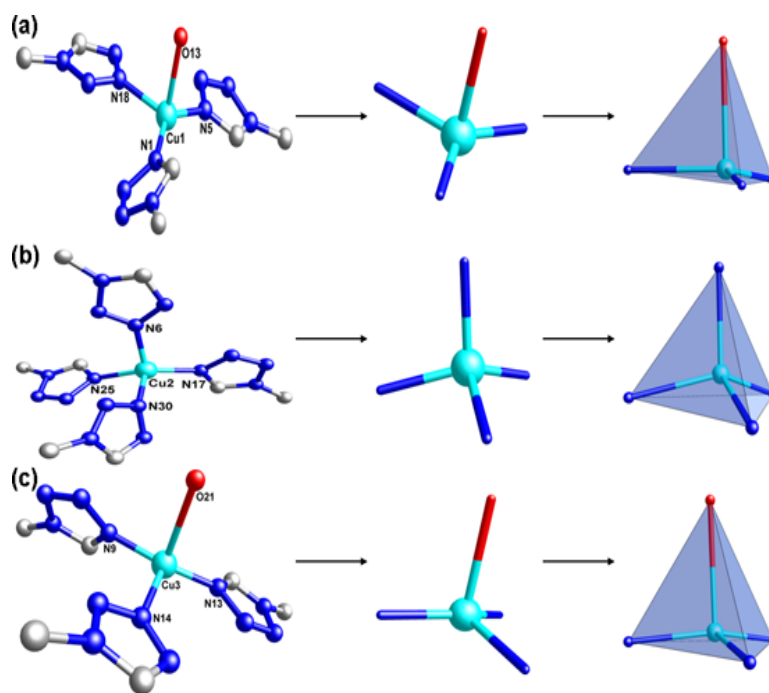

Fig. S18. The coordination details and modes of  $\text{Cu}^+$  ions in compound **3** (a) Cu1 (b) Cu2 (c) Cu3.

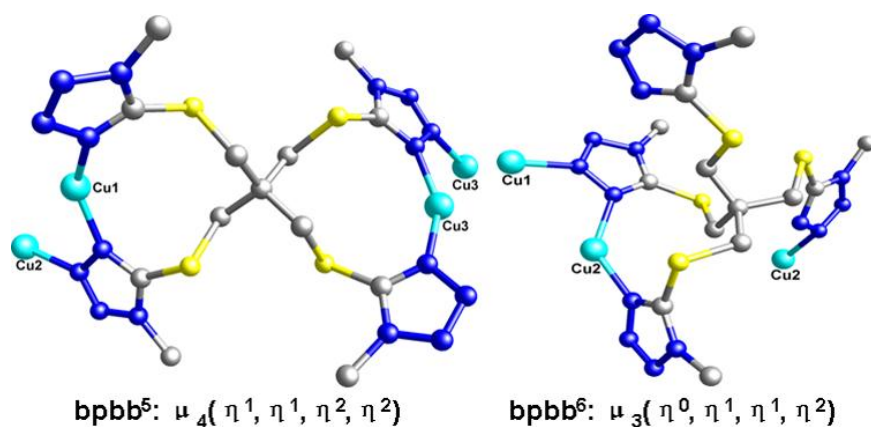

Fig. S19. The coordination modes of multiplex bpbb ligand in compound **3**.

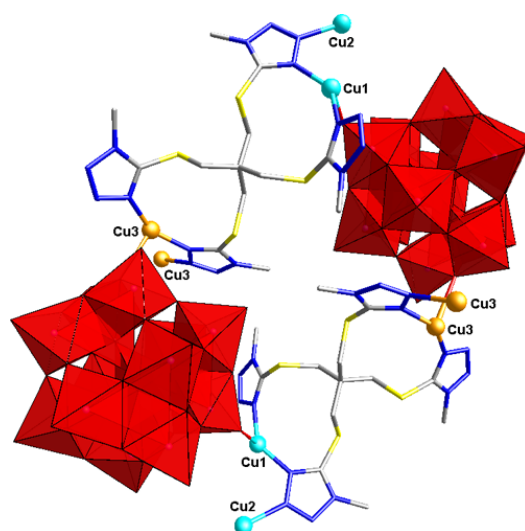

Fig. S20. Ball-and-stick and polyhedral representation of the dimer-5 structure in compound **3**.

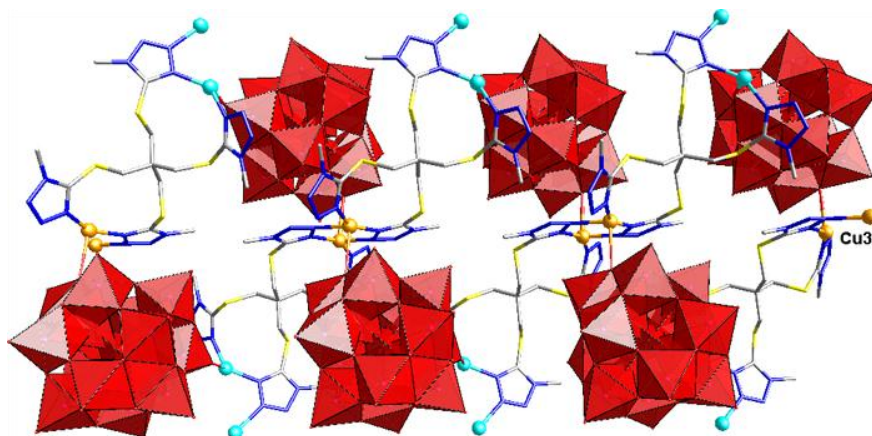

Fig. S21. The neighboring dimer-5 structures link together by sharing two Cu3 ions (orange) to generate a straight chain in compound **3**.



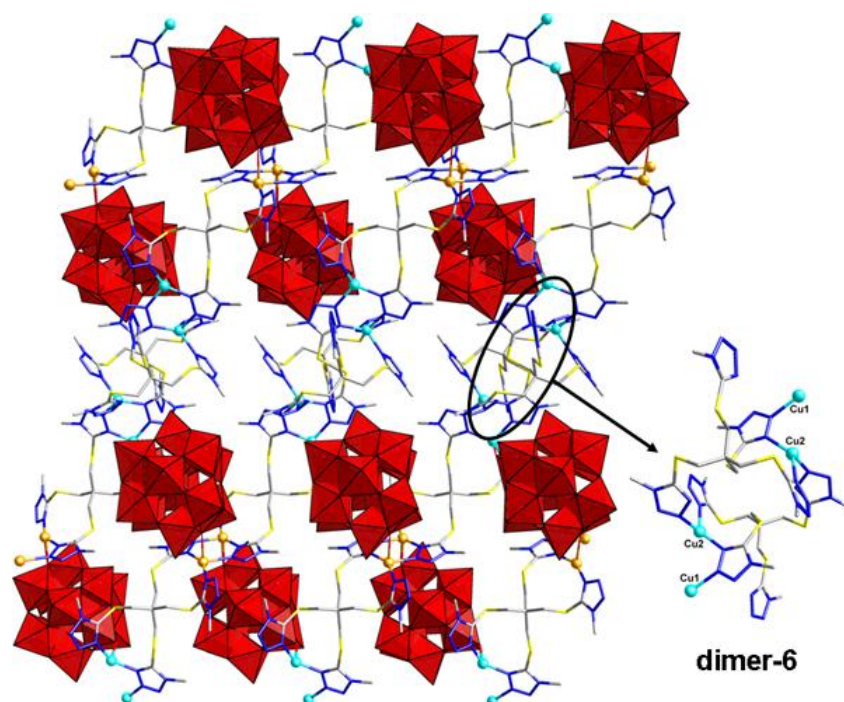

Fig. S22. Diagram illustrating the 2D layer in compound **3** which is constructed by straight chains and dimer-6 units. The dimer-6 unit is constructed by two bpbb<sup>6</sup> ligands.

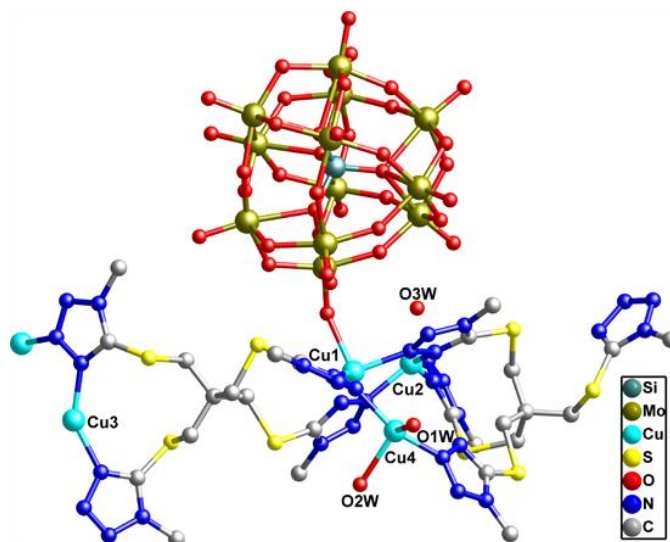

Fig. S23. Ball-and-stick view of the asymmetric unit of compound **4**. All H atoms are omitted for clarity.

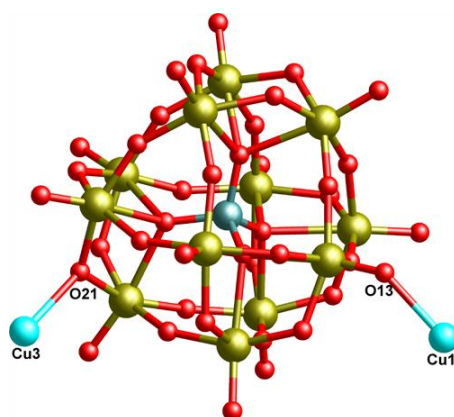

Fig. S24. View of coordination details of Keggin type polyoxoanion  $\text{SiMo}_{12}$  in compound **4**. Cu1 and Cu3 atoms are coordinated through the terminal O13 and bridging O21 atoms.

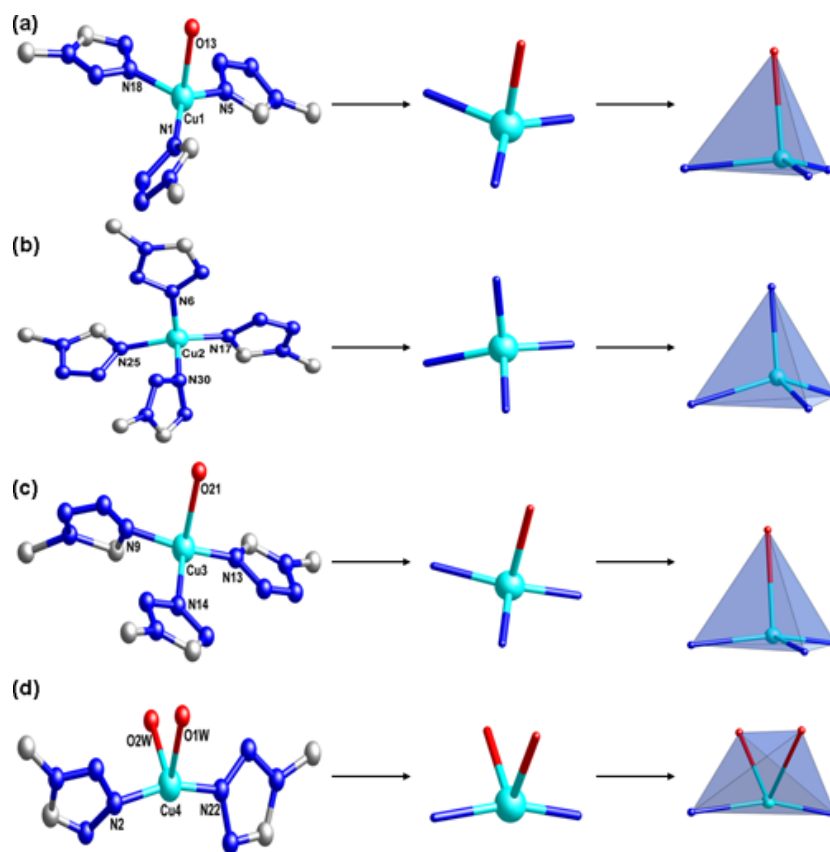

Fig. S25. The coordination details and modes of  $\text{Cu}^+$  ions in compound **4** (a) Cu1 (b) Cu2 (c) Cu3 (d) Cu4.

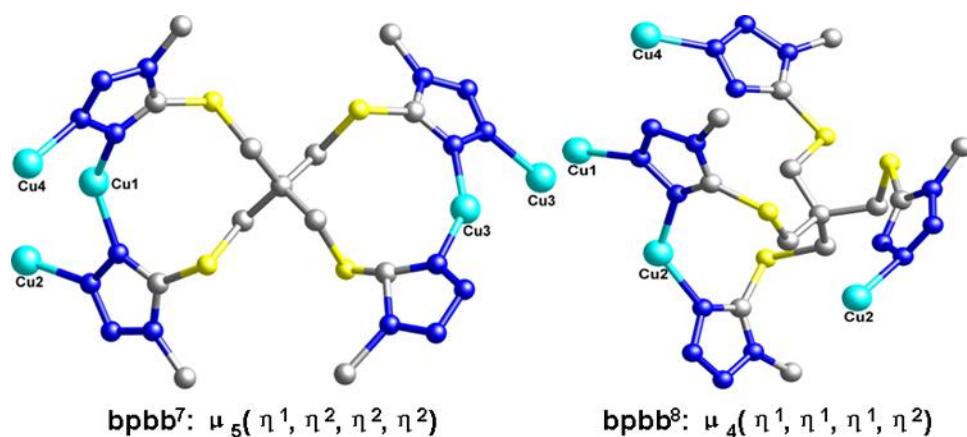

Fig. S26. The coordination modes of multiplex bpbb ligand in compound **4**.

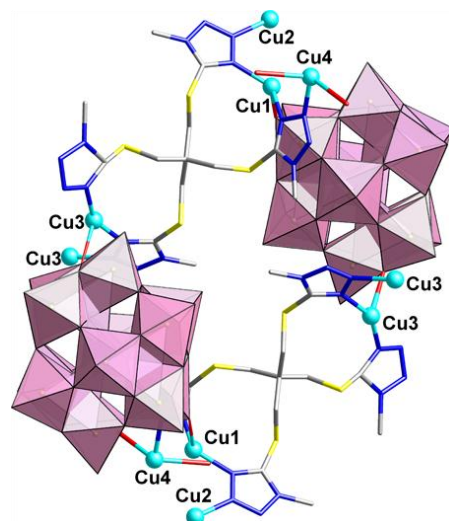

Fig. S27. Ball-and-stick and polyhedral representation of the dimer-7 structure in compound **4**.

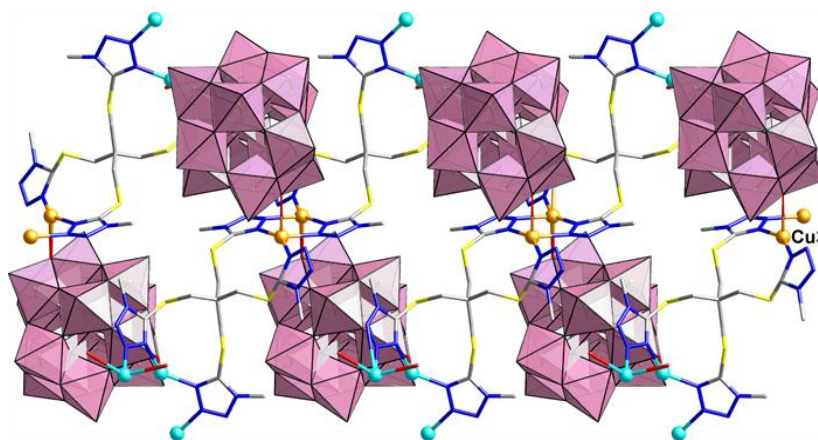

Fig. S28. The neighboring dimer-7 structures link together by sharing two Cu3 ions (orange) to generate a straight chain in compound **4**.

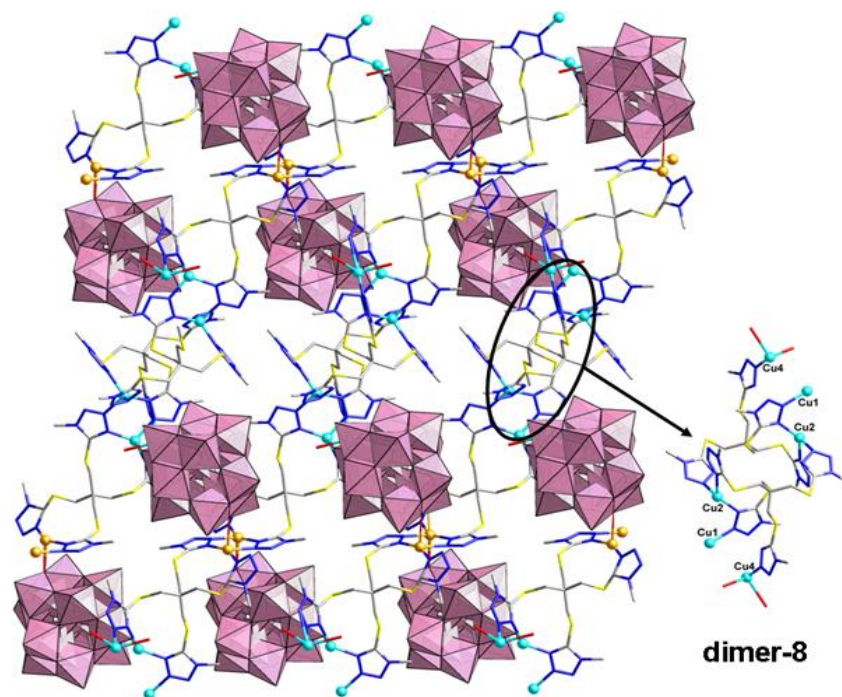

Fig. S29. Diagram illustrating of the 2D layer in compound **4** which is constructed by straight chains and dimer-8 units. The dimer-8 unit is constructed by two bpbb<sup>8</sup> ligands.

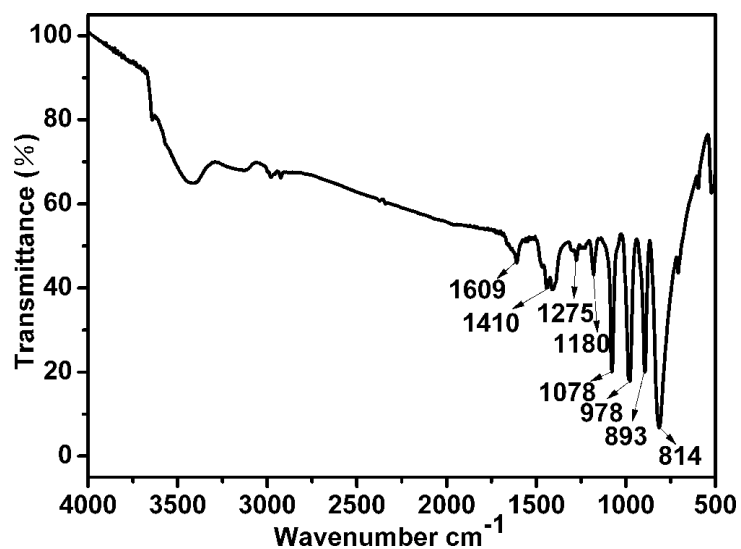

Fig. S30. The IR spectrum of compound **1** exhibits four characteristic asymmetric vibrations resulting from the  $[\text{PW}_{12}\text{O}_{40}]^{3-}$  polyanion. The characteristic bands at 814, 893, 978 and 1078  $\text{cm}^{-1}$  are attributed to  $\nu(\text{W}-\text{O}_t)$ ,  $\nu(\text{W}-\text{O}_b-\text{W})$ ,  $\nu(\text{W}-\text{O}_c-\text{W})$  and  $\nu(\text{P}-\text{O})$ , respectively. The bands in the range of 1180–1609  $\text{cm}^{-1}$  are assigned to the vibrations of bpbb ligands.

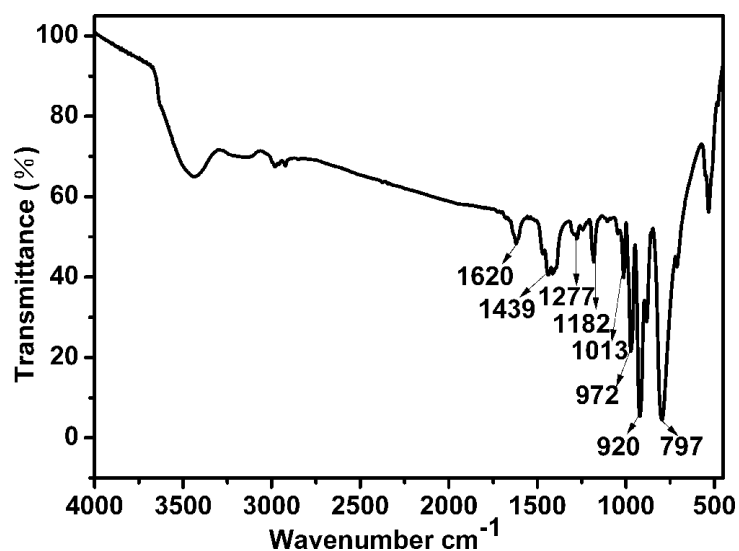

Fig. S31. The IR spectrum of compound **2** exhibits four characteristic asymmetric vibrations resulting from the  $[\text{SiW}_{12}\text{O}_{40}]^{4-}$  polyanion. The characteristic bands at 797, 920, 972 and 1013  $\text{cm}^{-1}$  are attributed to  $\nu(\text{W-O}_t)$ ,  $\nu(\text{W-O}_b\text{-W})$ ,  $\nu(\text{W-O}_c\text{-W})$  and  $\nu(\text{Si-O})$ , respectively. The bands in the range of 1182–1620  $\text{cm}^{-1}$  are assigned to the vibrations of bpbb ligands.

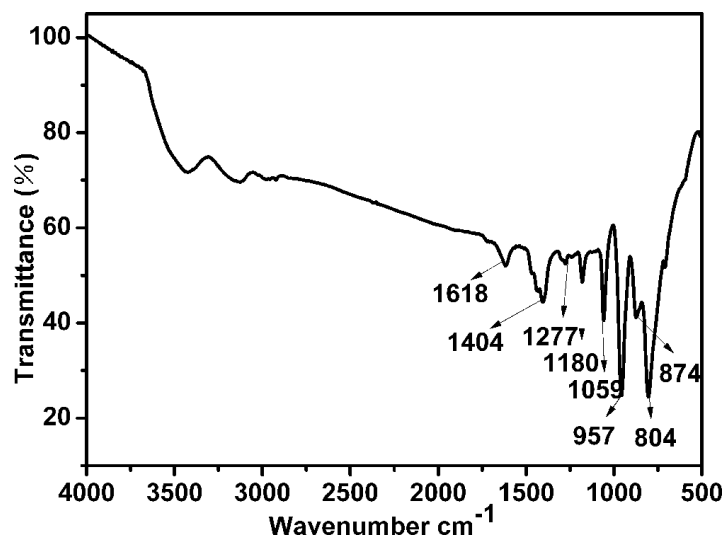

Fig. S32. The IR spectrum of compound **3** exhibits four characteristic asymmetric vibrations resulting from the  $[\text{PMo}_{12}\text{O}_{40}]^{3-}$  polyanion. The characteristic bands at 804, 874, 957 and 1059  $\text{cm}^{-1}$  are attributed to  $\nu(\text{Mo-O}_t)$ ,  $\nu(\text{Mo-O}_b\text{-Mo})$ ,  $\nu(\text{Mo-O}_c\text{-Mo})$  and  $\nu(\text{P-O})$ , respectively. The bands in the range of 1180–1618  $\text{cm}^{-1}$  are assigned to the vibrations of bpbb ligands.

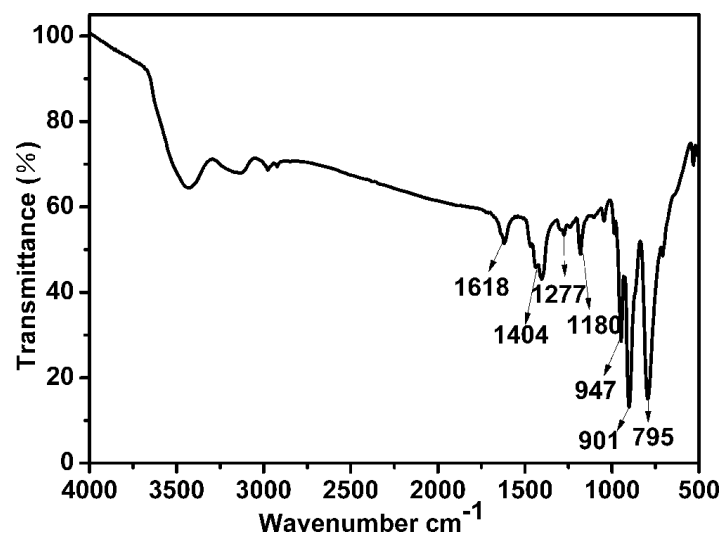

Fig. S33. The IR spectrum of compound **4** exhibits three characteristic asymmetric vibrations resulting from the  $[\text{SiMo}_{12}\text{O}_{40}]^{4-}$  polyanion. The characteristic bands at 795, 901 and 947  $\text{cm}^{-1}$  are attributed to  $\nu(\text{Mo-O}_t)$ ,  $\nu(\text{Mo-O}_b\text{-Mo})$ ,  $\nu(\text{Mo-O}_c\text{-Mo})$  and  $\nu(\text{Si-O})$ , respectively. The bands in the range of 1180–1618  $\text{cm}^{-1}$  are assigned to the vibrations of bpbb ligands.

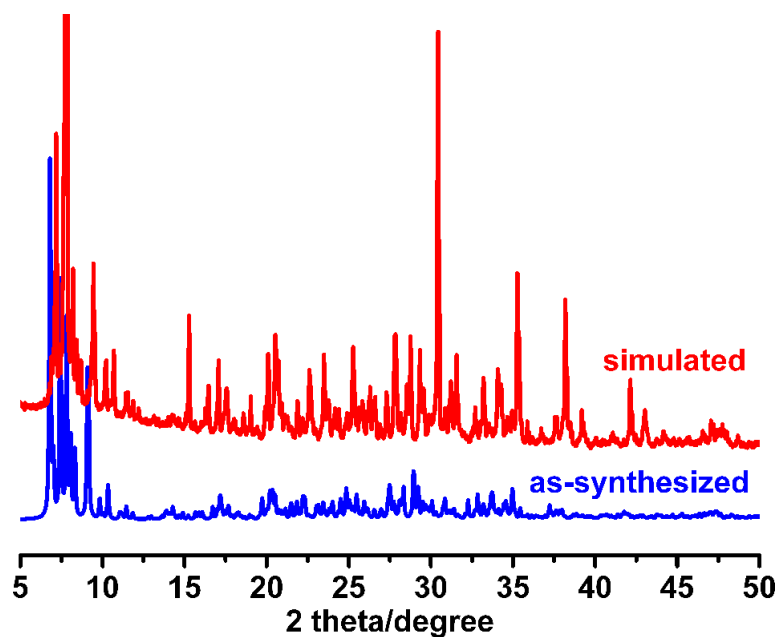

Fig. S34. Experimental XRD patterns of compound **1** exposed in air (blue) and simulation patterns of compound **1** (red).



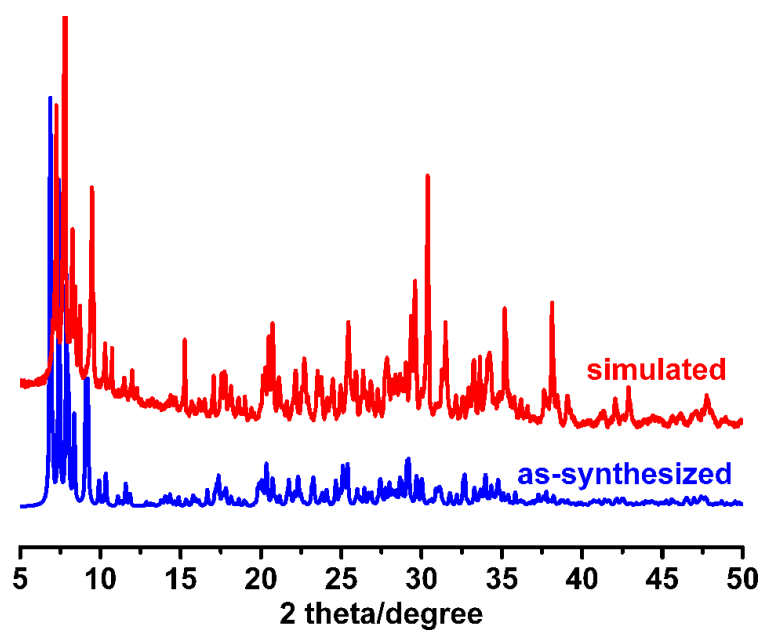

Fig. S35. Experimental XRD patterns of compound **2** exposed in air (blue) and simulation patterns of compound **2** (red).

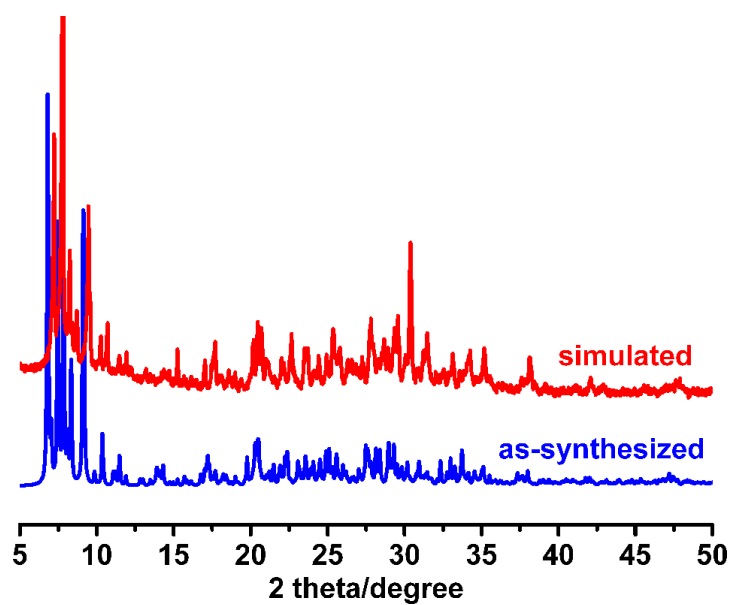

Fig. S36. Experimental XRD patterns of compound **3** exposed in air (blue) and simulation patterns of compound **3** (red).



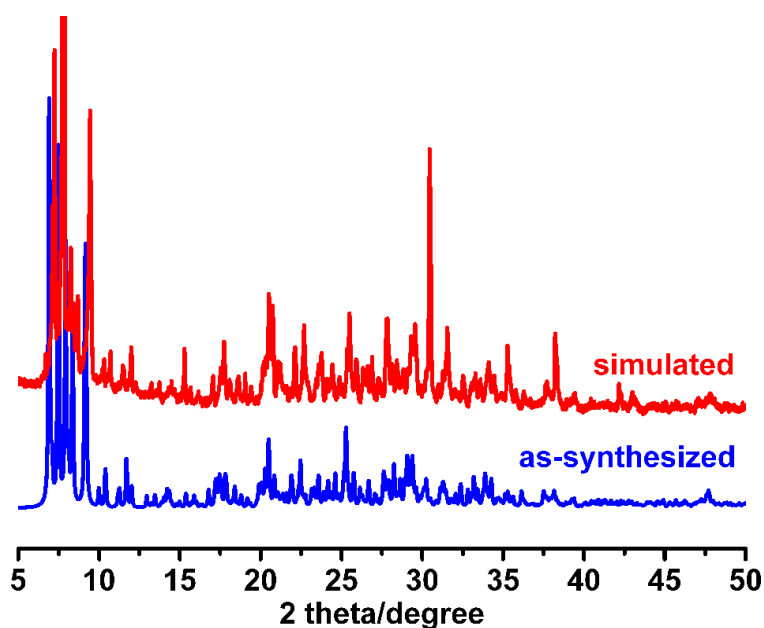

Fig. S37. Experimental XRD patterns of compound **4** exposed in air (blue) and simulation patterns of compound **4** (red).

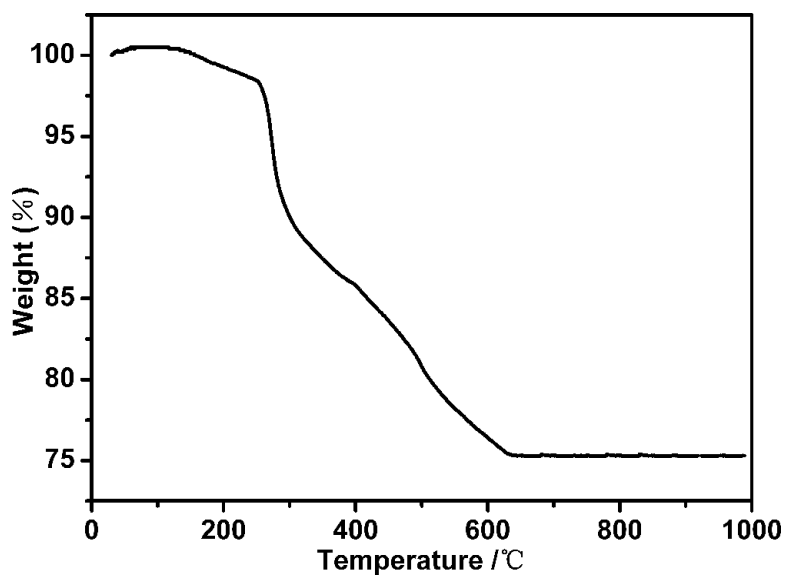

Fig. S38. TG experiments of compound **1** were performed under  $N_2$  atmosphere with a heating rate of 10 °C/min in the temperature range of 0-1000 °C. The TG curve indicates that water molecules are eliminated from the network (calcd 1.29%; found 1.56%) when the temperature is increased from room temperature to about 250 °C. The weight loss of 24.16% (calc. 25.27%) from 250 to 630 °C corresponds to the loss of bpbb molecules.

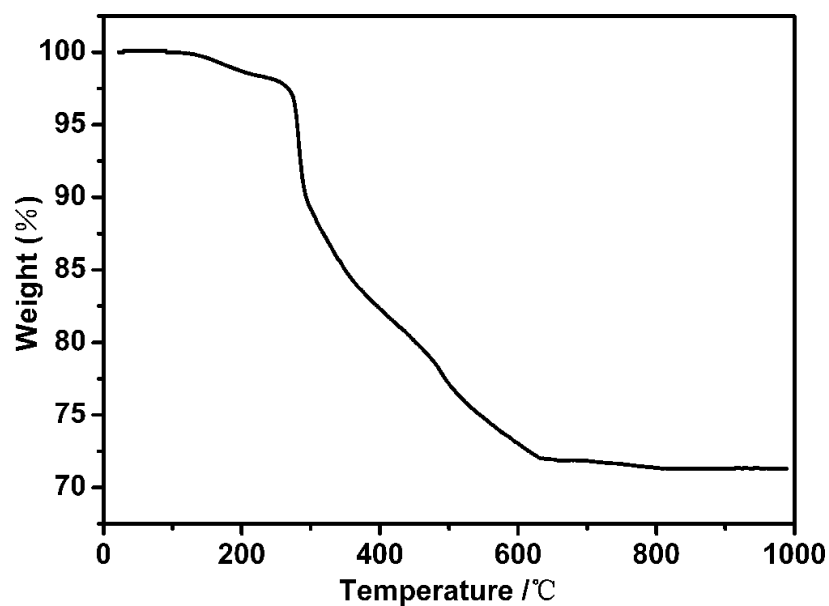

Fig. S39. TG experiments of compound **2** were performed under N<sub>2</sub> atmosphere with a heating rate of 10 °C/min in the temperature range of 0-1000 °C. The TG curve indicates that water molecules are eliminated from the network (calcd 1.27%; found 1.95%) when the temperature is increased from room temperature to about 250 °C. The weight loss of 25.85% (calc. 24.91%) from 250 to 630 °C corresponds to the loss of bpbb molecules.

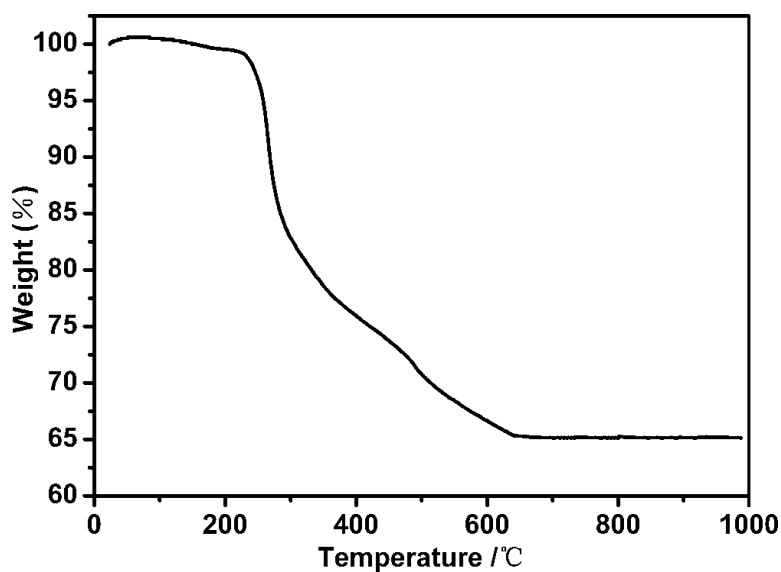

Fig. S40. TG experiments of compound **3** were performed under N<sub>2</sub> atmosphere with a heating rate of 10 °C/min in the temperature range of 0-1000 °C. The TG curve indicates that water molecules are eliminated from the network (calcd 1.73%; found 2.98%) when the temperature is increased from room temperature to about 250 °C. The weight loss of 32.24% (calc. 33.80%) from 250 to 630 °C corresponds to the loss of bpbb molecules.

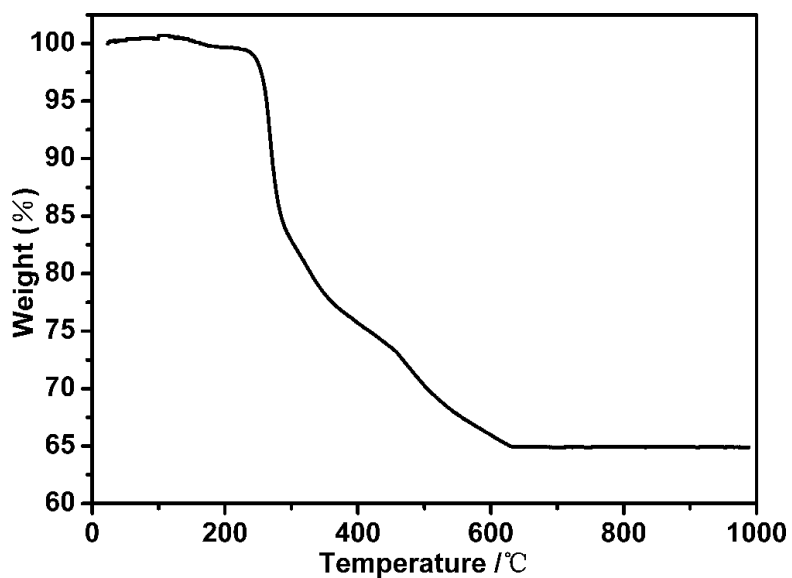

Fig. S41. TG experiments of compound **4** were performed under N<sub>2</sub> atmosphere with a heating rate of 10 °C/min in the temperature range of 0-1000 °C. The TG curve indicates that water molecules are eliminated from the network (calcd 1.70%; found 1.83%) when the temperature is increased from room temperature to about 250 °C. The weight loss of 33.42% (calc. 33.16%) from 250 to 630 °C corresponds to the loss of bpbb molecules.
